# Supplementary material for: Fe substitution in urchin-like NiCo2O4for energy storage devices
Source: Royal Society of Chemistry journal article supplement (doi:10.1039/c8ra10586c), 2019-01-01
Supplement: c8ra10586c1.pdf [file c8ra10586c1.pdf]

## Supplementary Material

### Fe substitution in urchin-like NiCo<sub>2</sub>O<sub>4</sub> for energy storage devices

Yuan Yuan, Duanfu Long, Zhong Li, Jiliang Zhu

College of Materials Science and Engineering, Sichuan University, Chengdu 610064, China

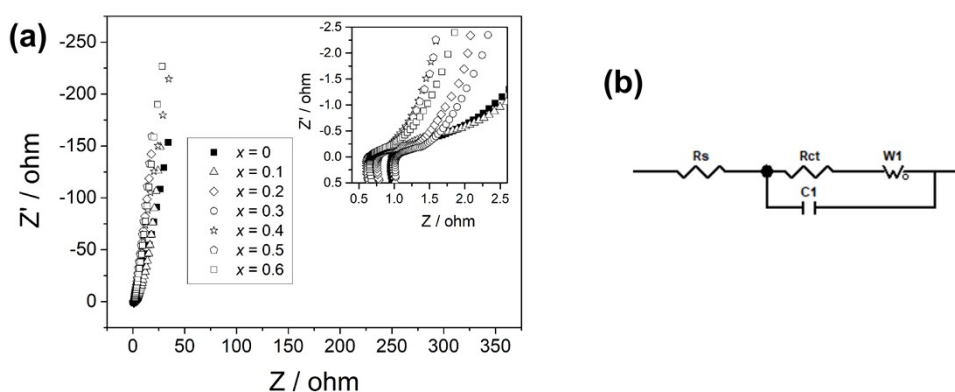

Fig. S1. (a) Nyquist plots of EIS with  $x = 0 \sim 0.6$ . (b) A Randle circuit used in this work to fit the EIS spectra.

Table S1. Values of  $R_s$ ,  $R_{ct}$  and  $Z_w$  of the fitting curves for compositions of  $x = 0 \sim 0.6$ .

| Values of $x$ | $R_s / \Omega$ | $R_{ct} / \Omega$ | $Z_w / \Omega$ |
|---------------|----------------|-------------------|----------------|
| 0             | 0.96           | 0.21              | 4.26           |
| 0.1           | 1.10           | 0.23              | 5.00           |
| 0.2           | 0.78           | 0.21              | 1.50           |
| 0.3           | 1.04           | 0.09              | 1.50           |
| 0.4           | 0.63           | 0.07              | 1.05           |
| 0.5           | 0.68           | 0.08              | 0.99           |
| 0.6           | 0.67           | 0.07              | 1.61           |

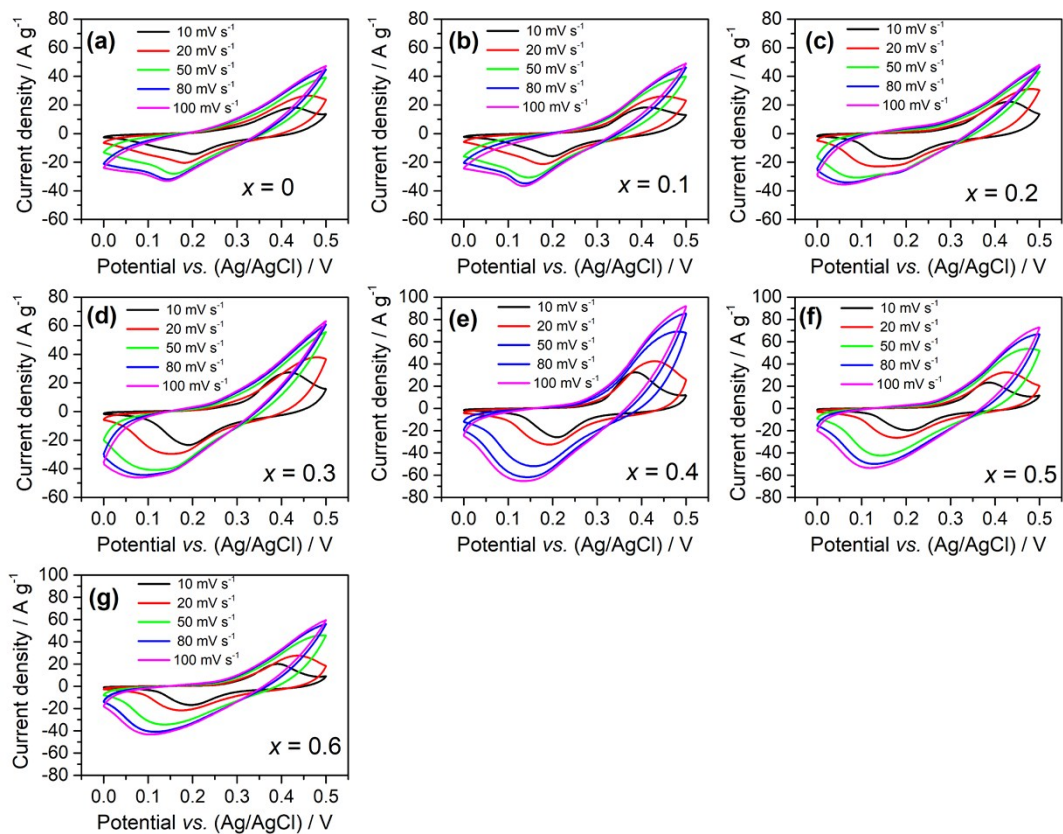

Fig. S2. (a)-(g) CV curves at scan rates from 10 to 100  $\text{mV s}^{-1}$  for compositions of  $x = 0\sim 0.6$ .

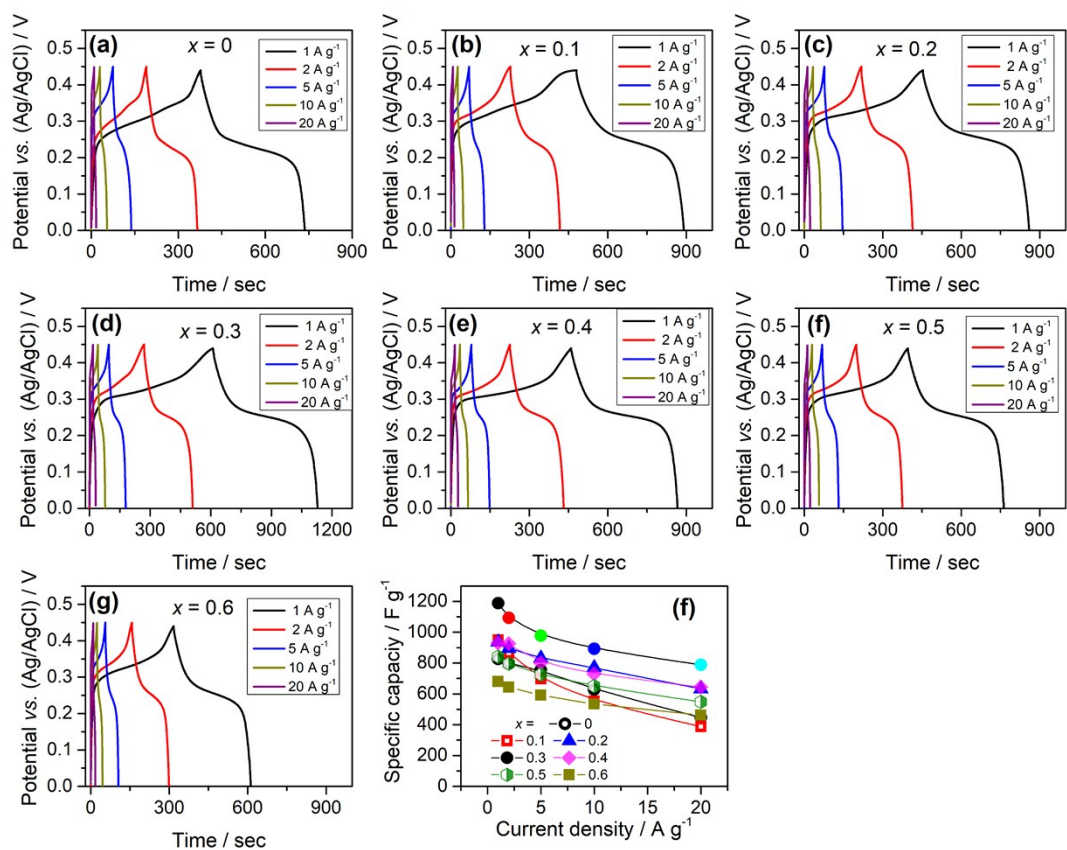

Fig. S3. (a)-(g) GCD curves at scan rates from 1 to 20  $\text{A g}^{-1}$  for compositions of  $x = 0\sim 0.6$ ; (f) corresponding specific capacitance derived from the discharge curves.

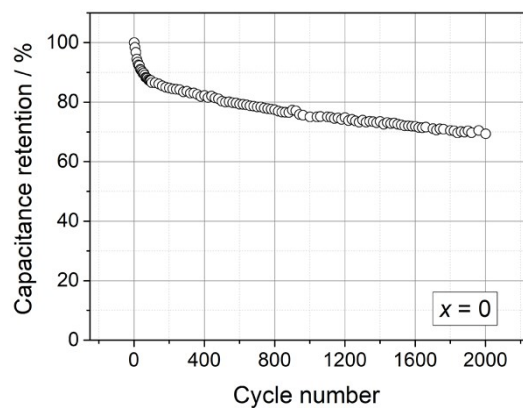

Fig. S4. Specific capacitance retention of  $x = 0$  in 2000 GCD cycles at 5  $\text{A g}^{-1}$ , tested in a three-electrode system.

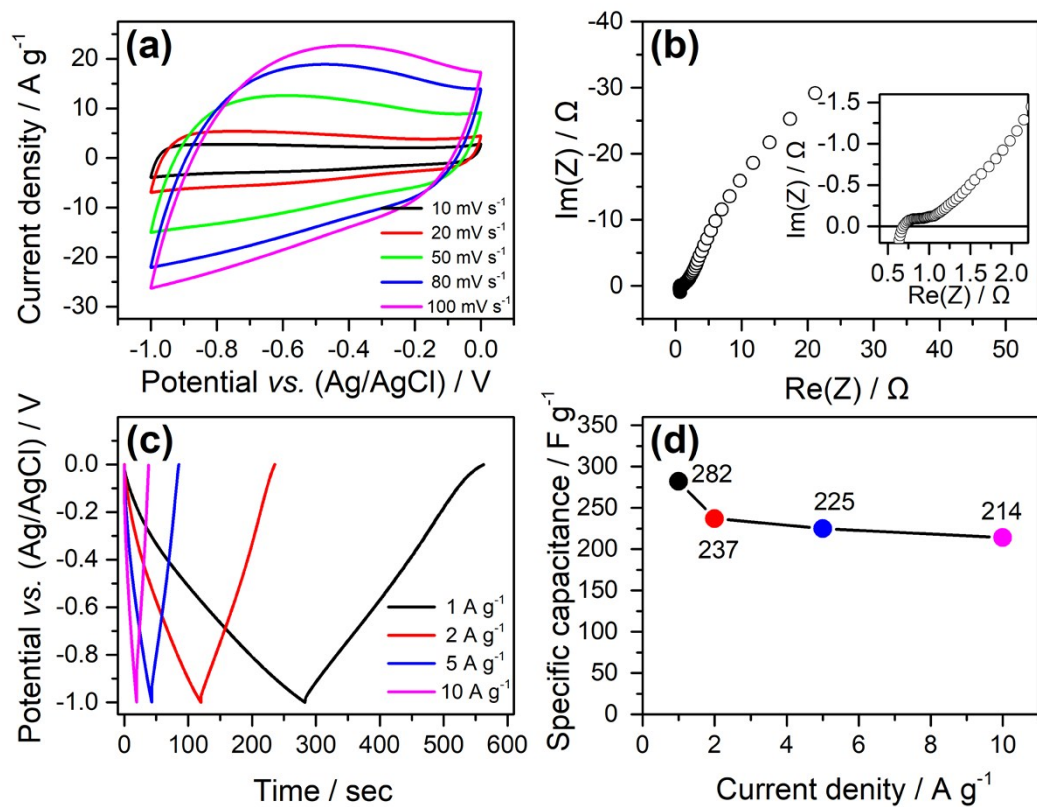

Fig. S5. Electrochemical performance of one typical commercial activated carbon electrode in a three-electrode configuration: (a) CV curves at scan rates from 10 to 100  $\text{mV s}^{-1}$ ; (b) Nyquist plots of EIS, inset shows the enlarged view of the high frequency area; (c) GCD curves at scan rates from 1 to 10  $\text{A g}^{-1}$ ; (d) specific capacitance derived from the GCD curves.
